# Supplementary material for: Periodic trends in metal–metal interactions in face-shared [M2Cl9]z−systems
Source: Royal Society of Chemistry journal article supplement (doi:10.1039/b512393c), 2006-01-01

## Supporting Information

**Figure S1.** Plots of the metal-metal bonding energy ( $\Delta E_{\text{mbe}}$ ) as a function of the square of the spin density ( $\rho_s^2$ ) in the  $S=S_{\text{max}}$  state for same-valence  $d^n d^n$   $[\text{M}_2\text{Cl}_9]^{3-}$  and  $[\text{M}'\text{M}''\text{Cl}_9]^{3-}$  systems.

**Figure S2.** Plots of the spin polarization energy ( $\Delta E_{\text{spe}}$ ) as a function of the square of the spin density ( $\rho_s^2$ ) in the  $S=S_{\text{max}}$  state for same-valence  $d^n d^n$   $[\text{M}_2\text{Cl}_9]^{3-}$  and  $[\text{M}'\text{M}''\text{Cl}_9]^{3-}$  systems.

**Figure S3.** Plots of the metal-metal bonding energy ( $\Delta E_{\text{mbe}}$ ) and spin polarization energy ( $\Delta E_{\text{spe}}$ ) as a function of the square of the spin density ( $\rho_s^2$ ) in the  $S=S_{\text{max}}$  state for mixed-valence  $d^{n-1} d^n$   $[\text{M}_2\text{Cl}_9]^{2-}$  systems.

Figure S1

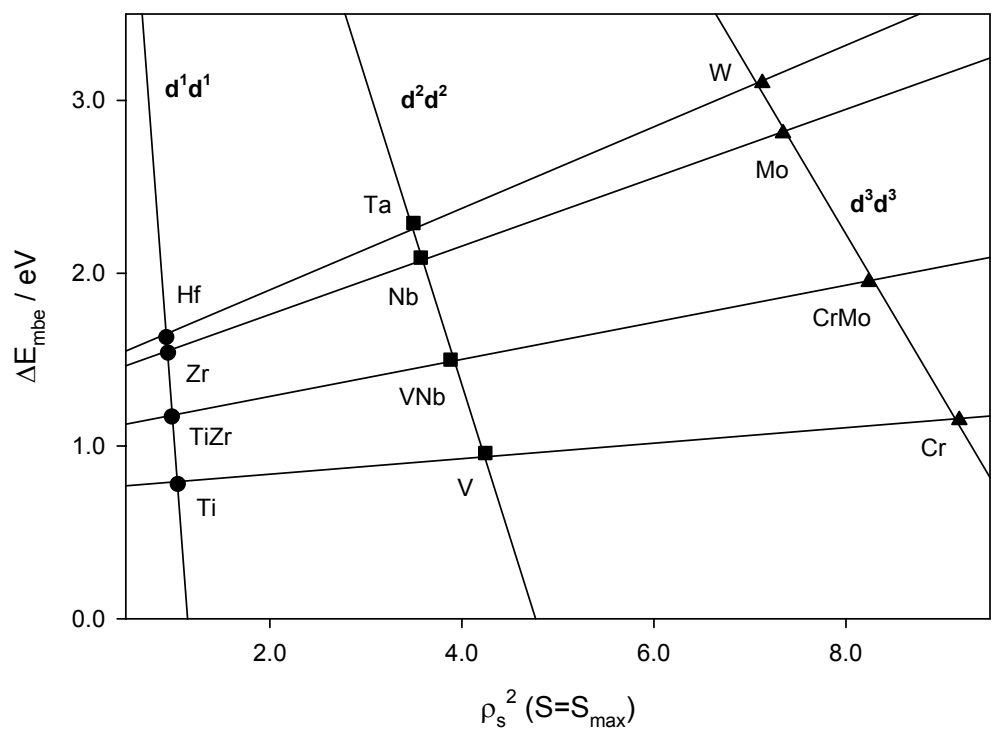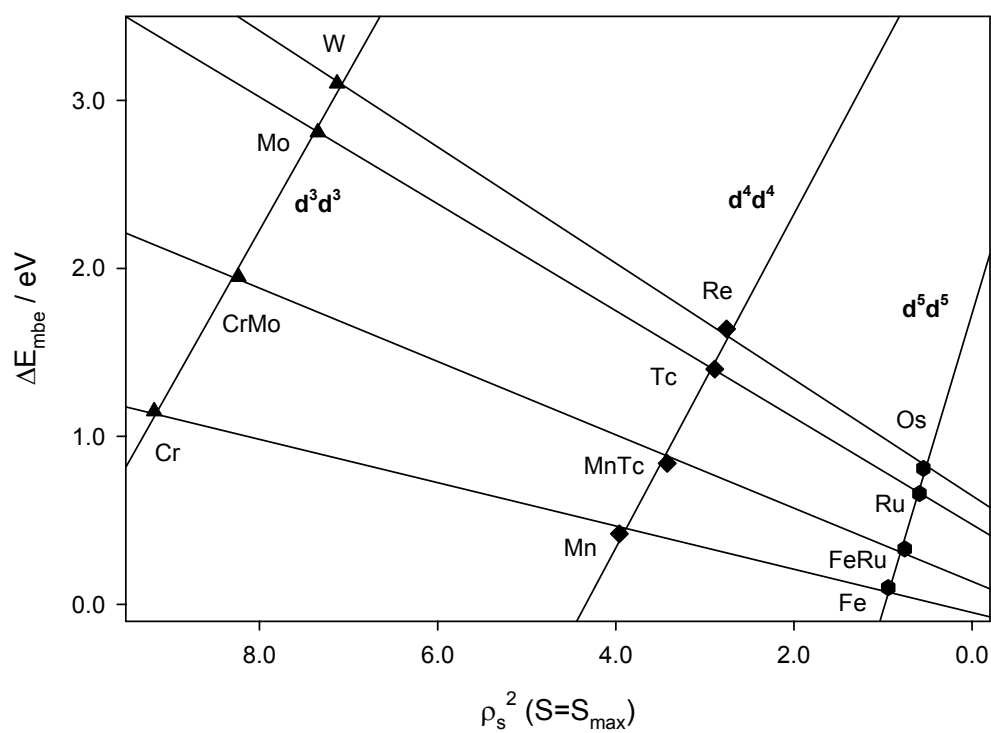

Figure S2

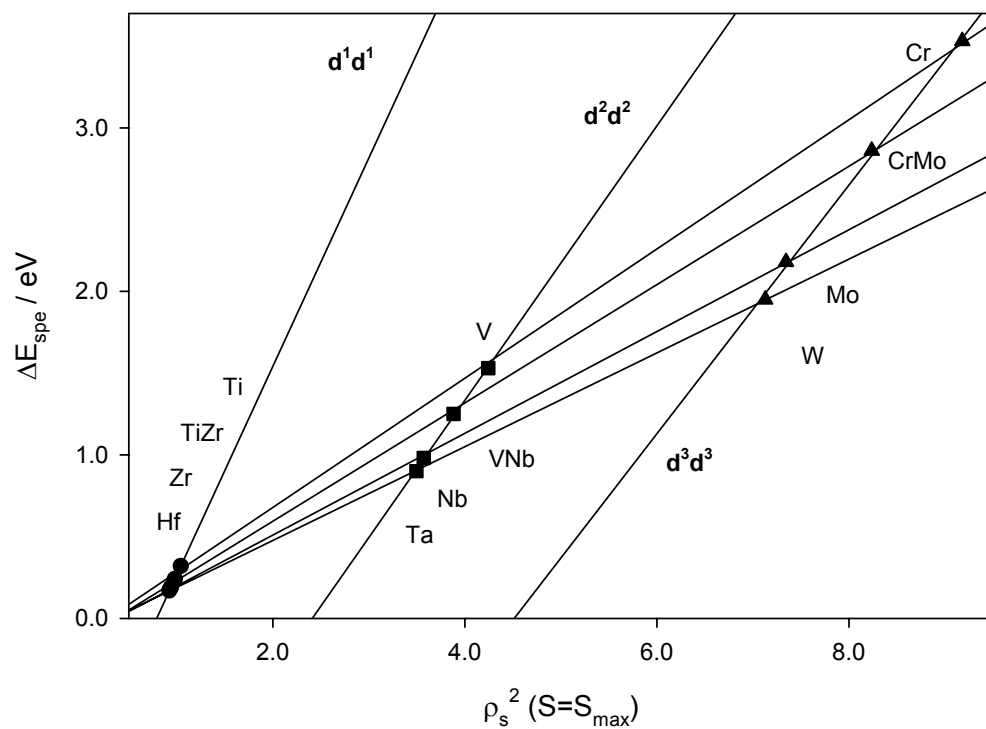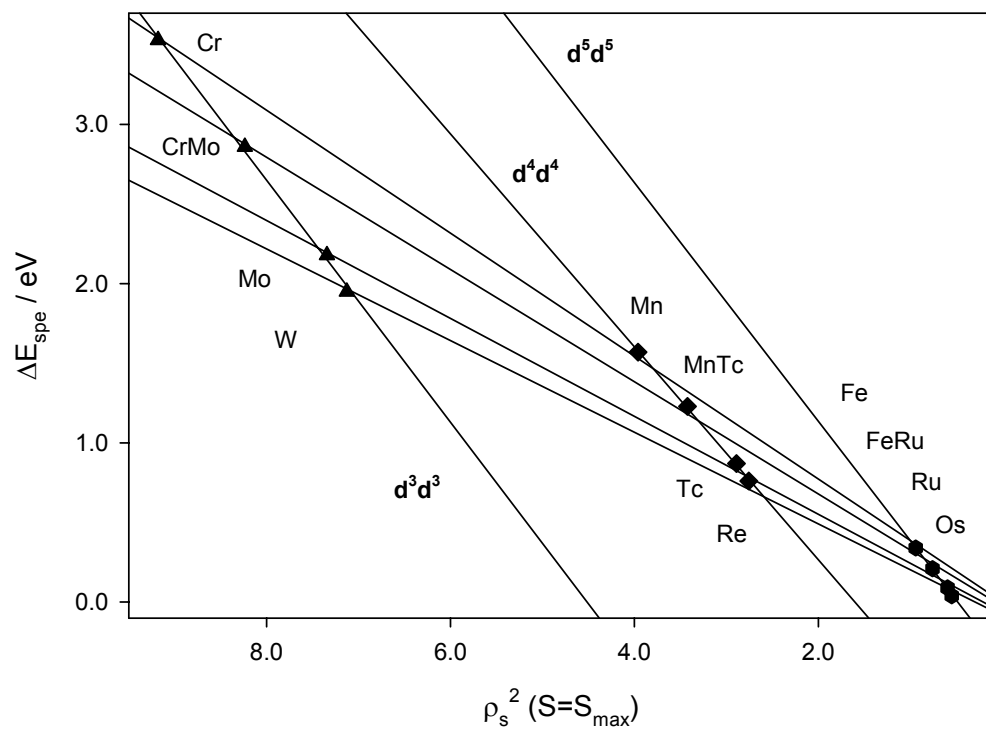

Figure S3

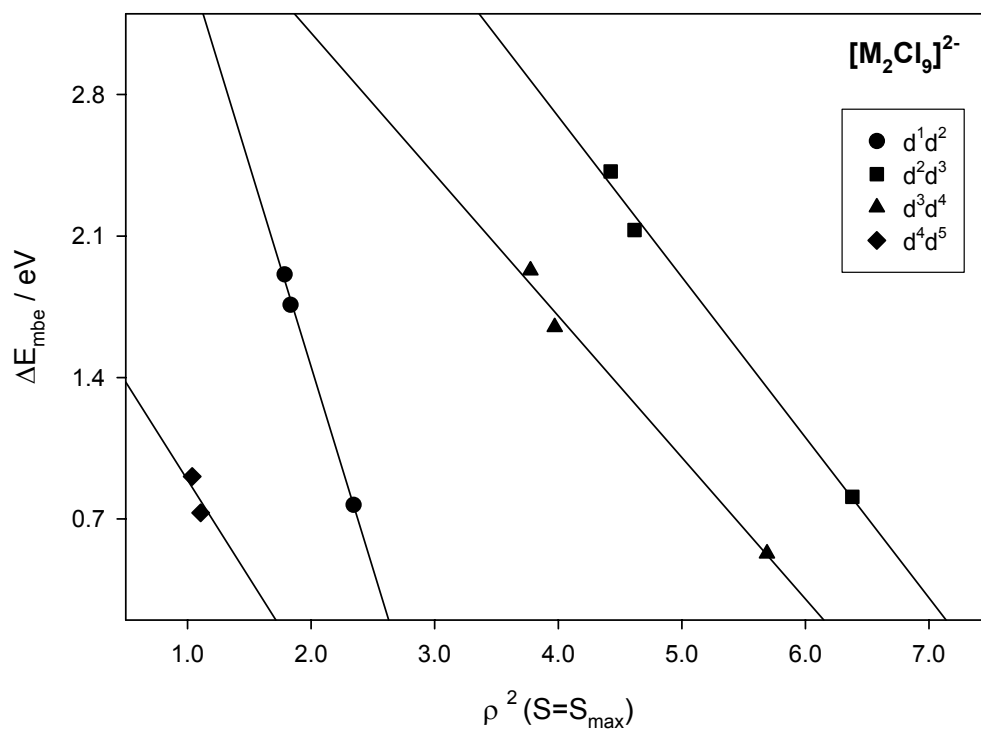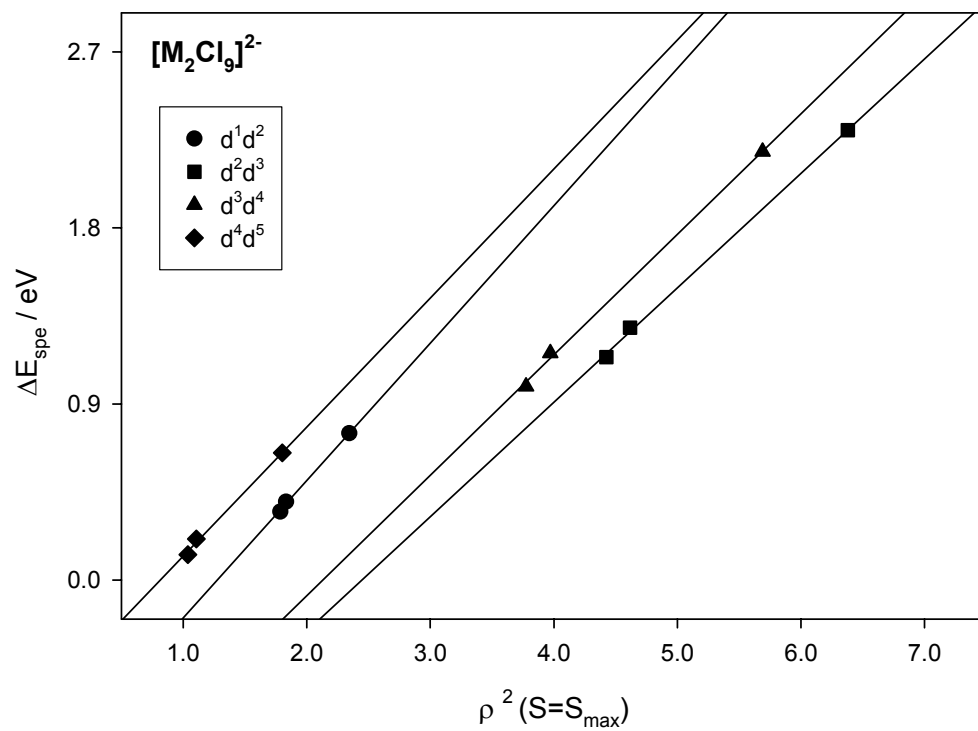

Supplement: b512393c.pdf [file b512393c.pdf]
